# Supplementary material for: An anionic-ligand installed pyrene-based MOF for the fluorescence detection of paraquat
Source: Royal Society of Chemistry journal article supplement (doi:10.1039/d0nj05866a), 2021-01-01
Supplement: d0nj05866a1.pdf [file d0nj05866a1.pdf]

## **Electronic Supplementary Information**

### **Anionic ligand installed pyrene-based MOF for the fluorescent detection of paraquat**

Bo Zhao, Qi Yang, Jia-Si Wang, Feng-Yang Xie, Hong-Yi Yu, Yue Li,<sup>\*</sup> Yu-Xin Ma,<sup>\*</sup> and Wen-Juan Ruan<sup>\*</sup>

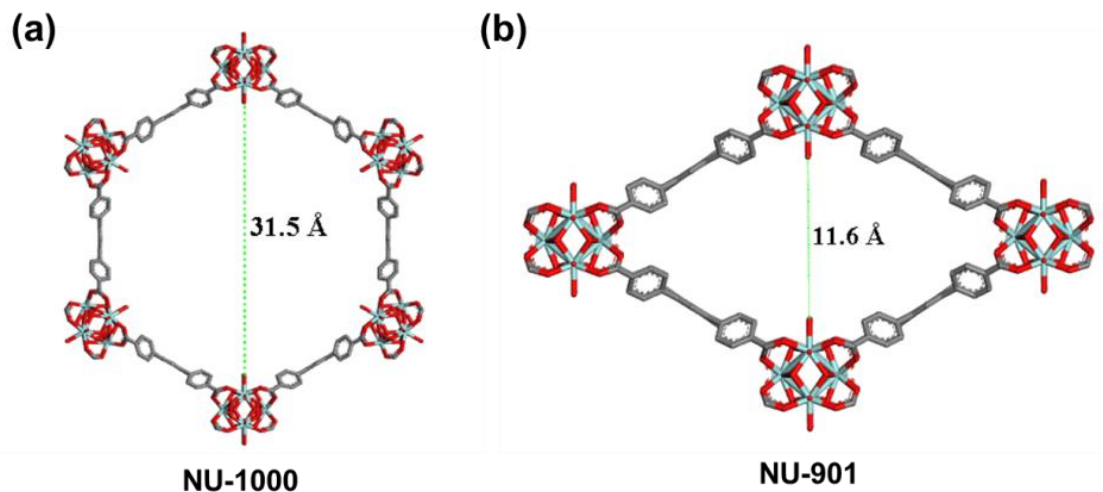

**Fig. S1** Distances between the Zr<sub>6</sub> clusters on the ab plane of (a) NU-1000 and (b) NU-901.

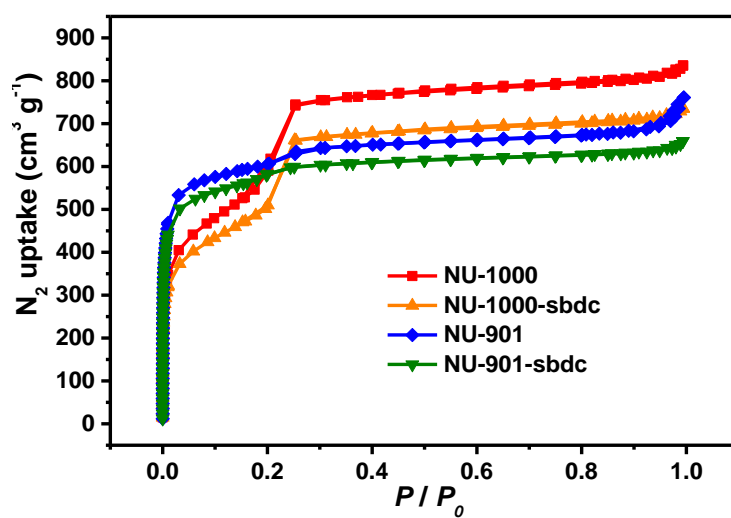

**Fig. S2** N<sub>2</sub> adsorption isotherms (at 77 K) of activated NU-1000, NU-901 and their derivatives.

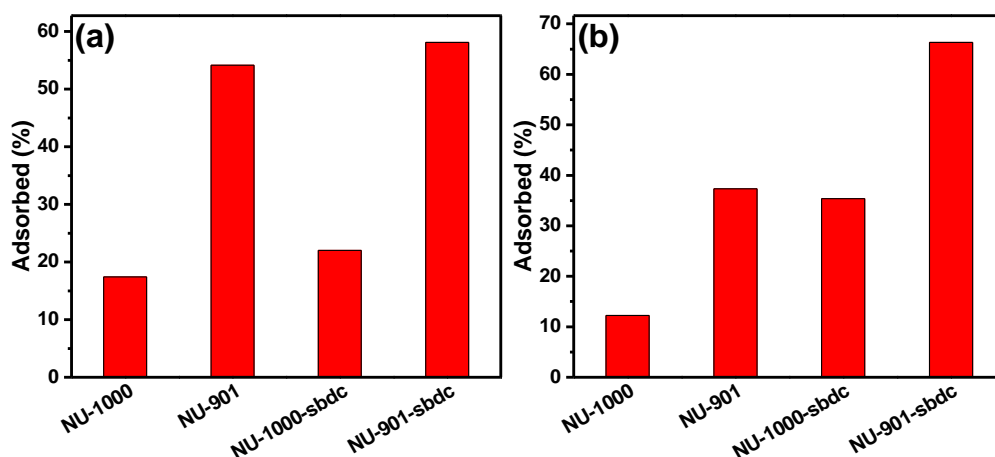

**Fig. S3** Adsorbed percentages of paraquat ( $c_0 = 75 \mu\text{M}$ ) by NU-1000, NU-901, NU-1000-sbdc and NU-901-sbdc ( $0.75 \text{ g L}^{-1}$ ) in (a) water and (b) DMF. Adsorbed percentages were calculated with the equation of  $\text{adsorb.}\% = (A_{\text{before}} - A_{\text{after}}) / A_{\text{before}}$ , where  $A_{\text{before}}$  and  $A_{\text{after}}$  are the absorbances of paraquat solution before and after MOF adsorption, respectively.

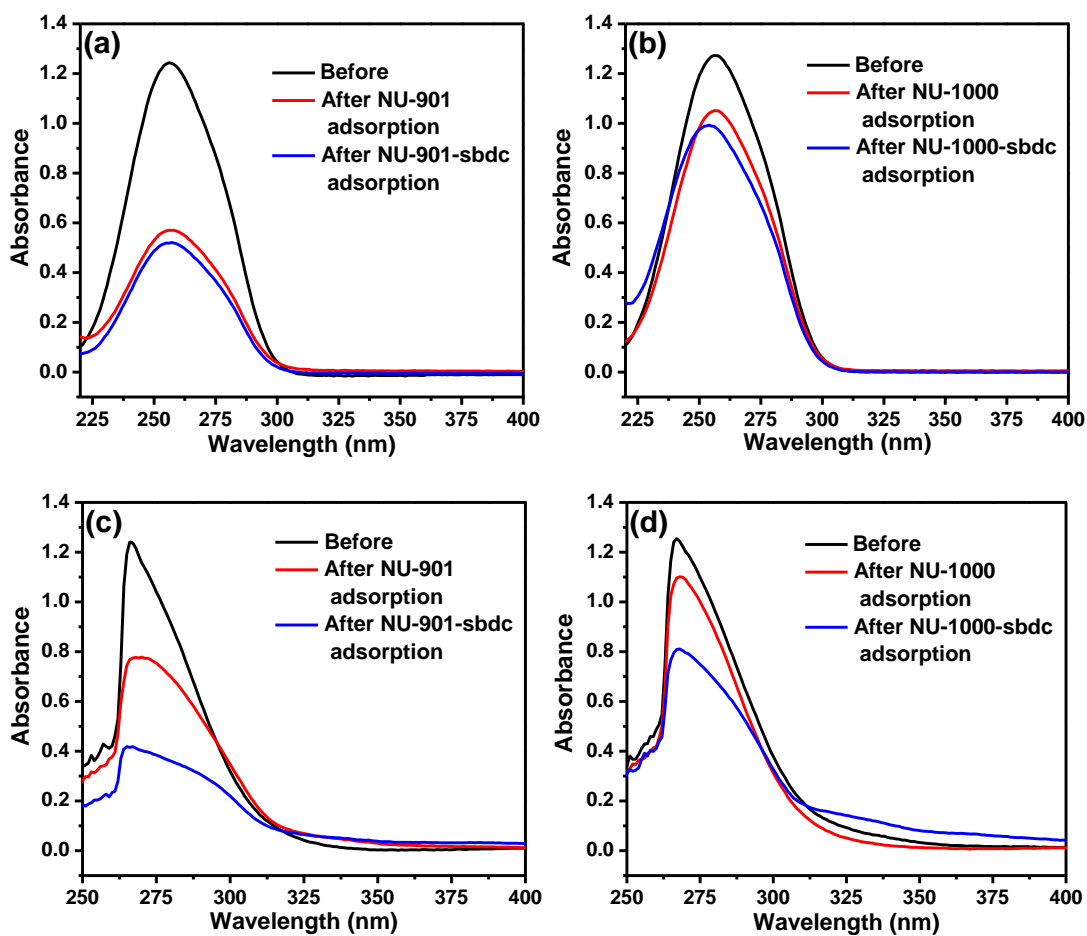

**Fig. S4** Absorption spectra of the solutions of paraquat in water (a, b) and DMF (c, d) before and after the adsorption by NU-901 (a, c), NU-1000 (b, d) and their anionic derivatives.

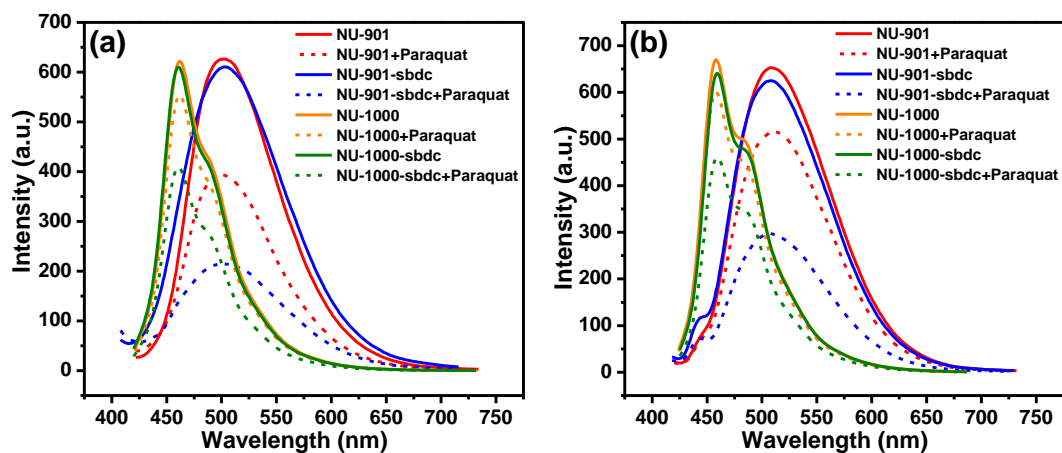

**Fig. S5** Fluorescent spectra of NU-1000, NU-901, NU-1000-sbdc and NU-901-sbdc ( $0.01 \text{ g L}^{-1}$ ) before and after the addition of paraquat ( $1.0 \mu\text{M}$ ) in (a) acetonitrile and (b) cyclohexane.

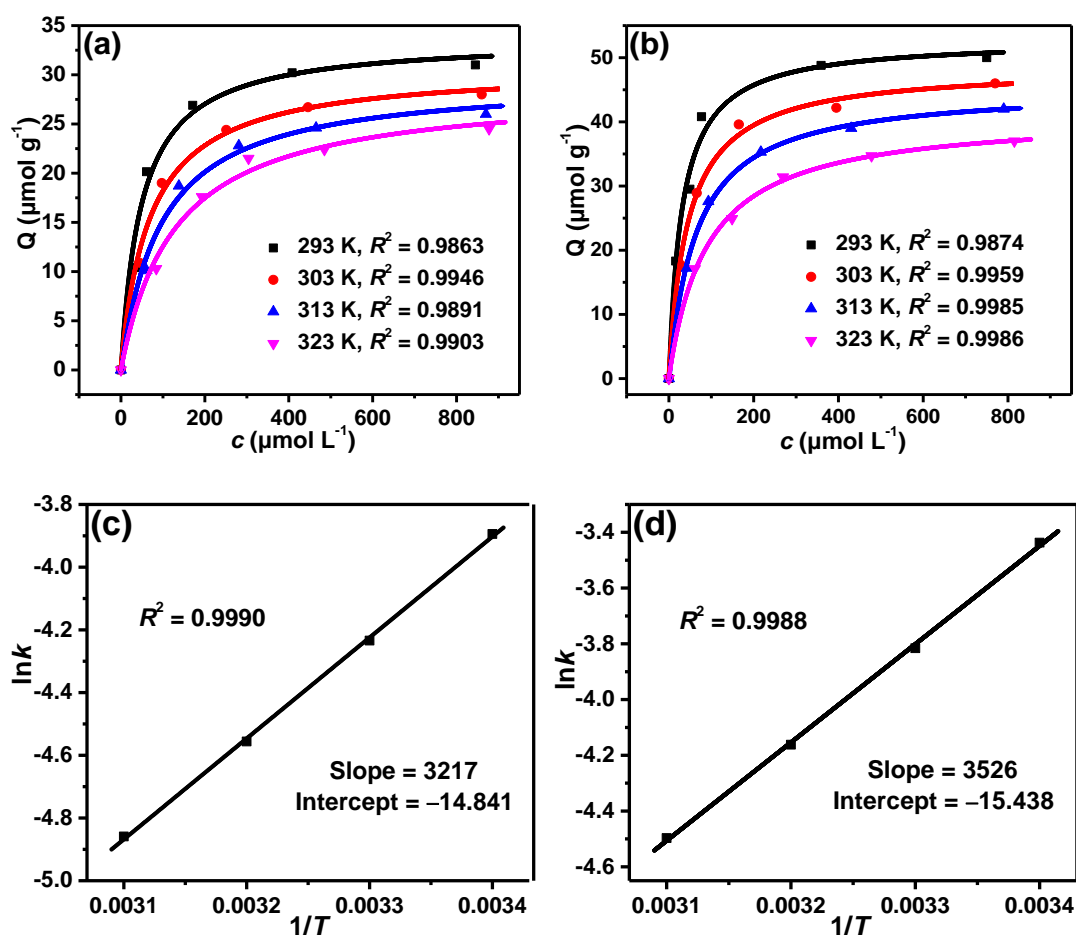

**Fig. S6** Adsorption isotherms of paraquat on (a) NU-901 and (b) NU-901-sbdc in the medium of DMF. The thermodynamic fitting of the adsorption constants of (c) NU-901 and (d) NU-901-sbdc at different temperatures.

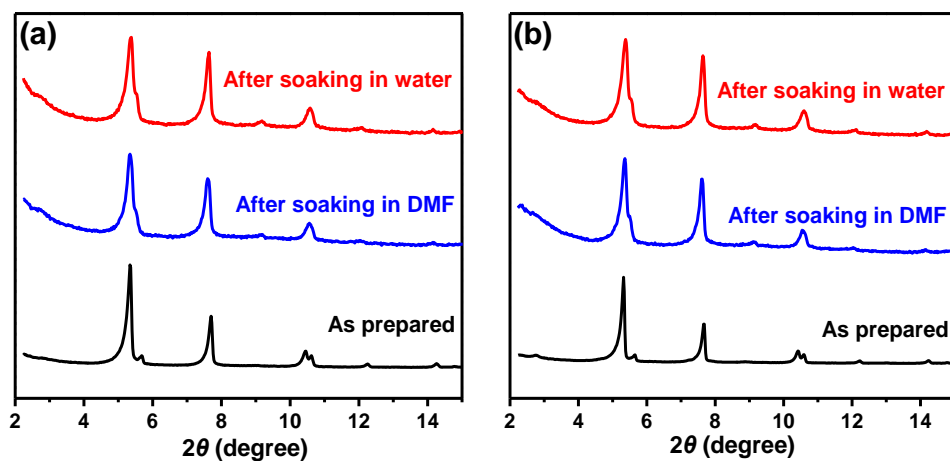

**Fig. S7** PXRD patterns of (a) NU-901 and (b) NU-901-sbdc before and after the fluorescent detection of paraquat in water and DMF.

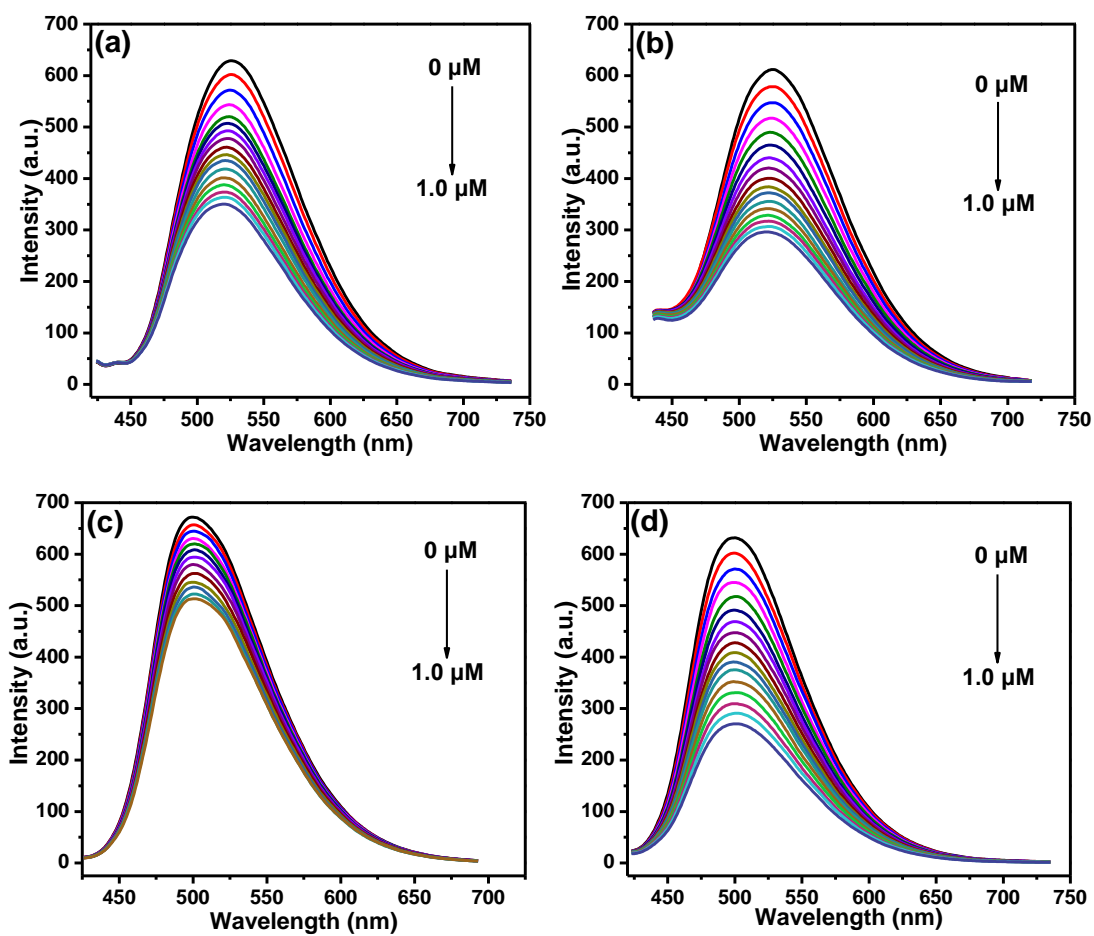

**Fig. S8** Fluorescent spectra of NU-901 (a, c) and NU-901-sbdc (b, d) in the media of water (a, b) and DMF (c, d) after the addition of different concentrations of paraquat.

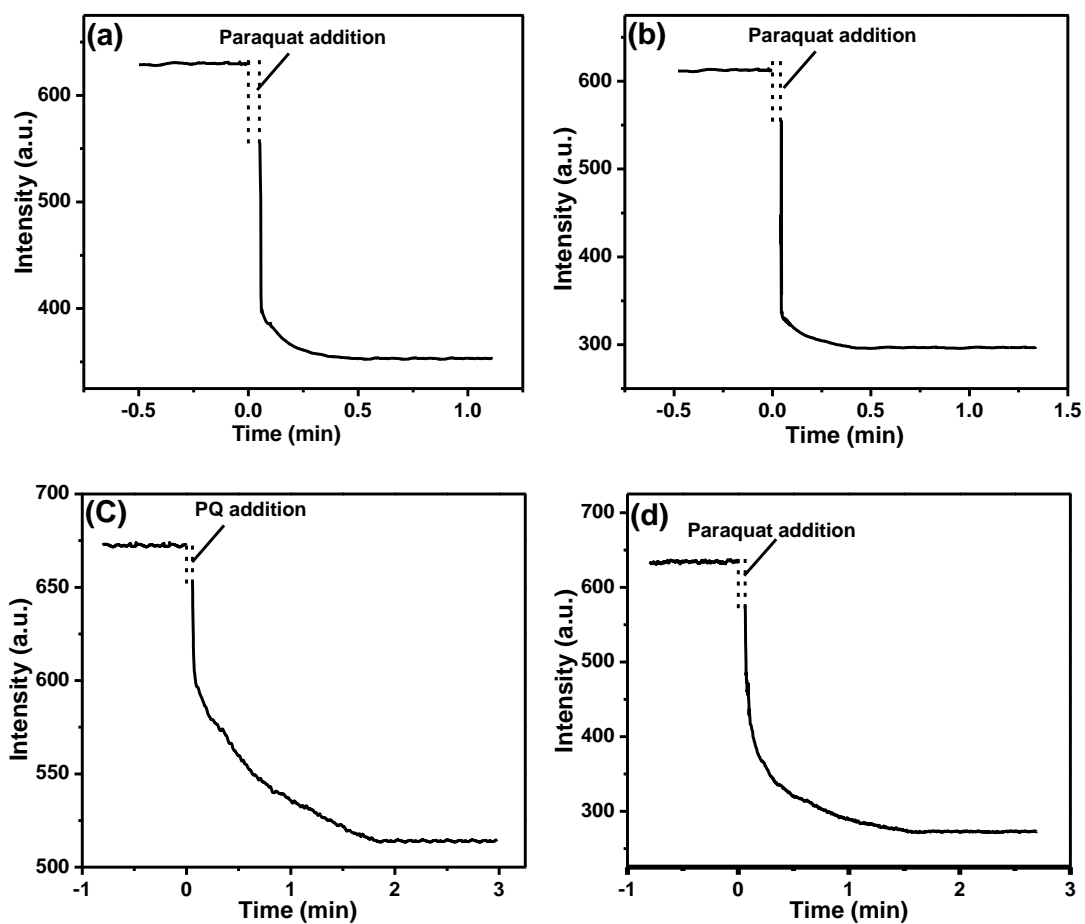

**Fig. S9** Response time of NU-901 (a, c) and NU-901-sbdc (b, d) to paraquat (1.0 μM) in the media of water (a, b) and DMF (c, d).

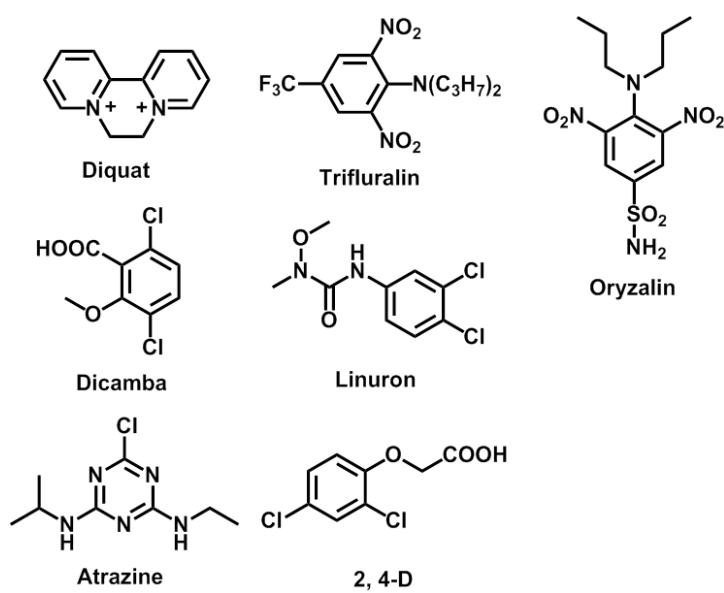

**Fig.S10** Structures of the other agrochemicals.

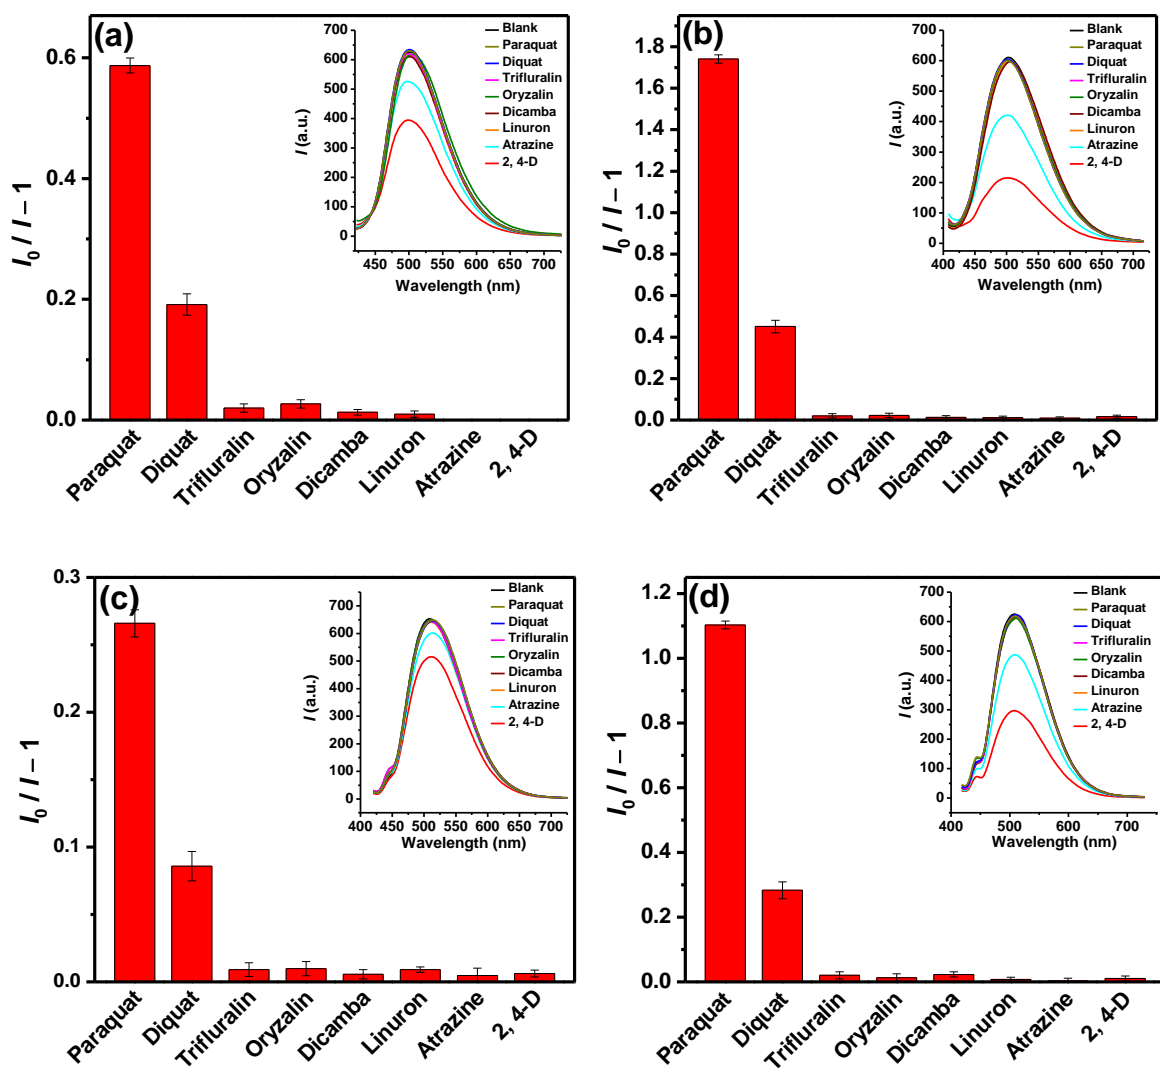

**Fig.S11** Fluorescent responses of NU-901 (a, c) and NU-901-sbdc (b, d) ( $0.01 \text{ g L}^{-1}$ ) to different agrochemicals ( $1.0 \mu\text{M}$ ) in acetonitrile (a, b) and cyclohexane (c, d).

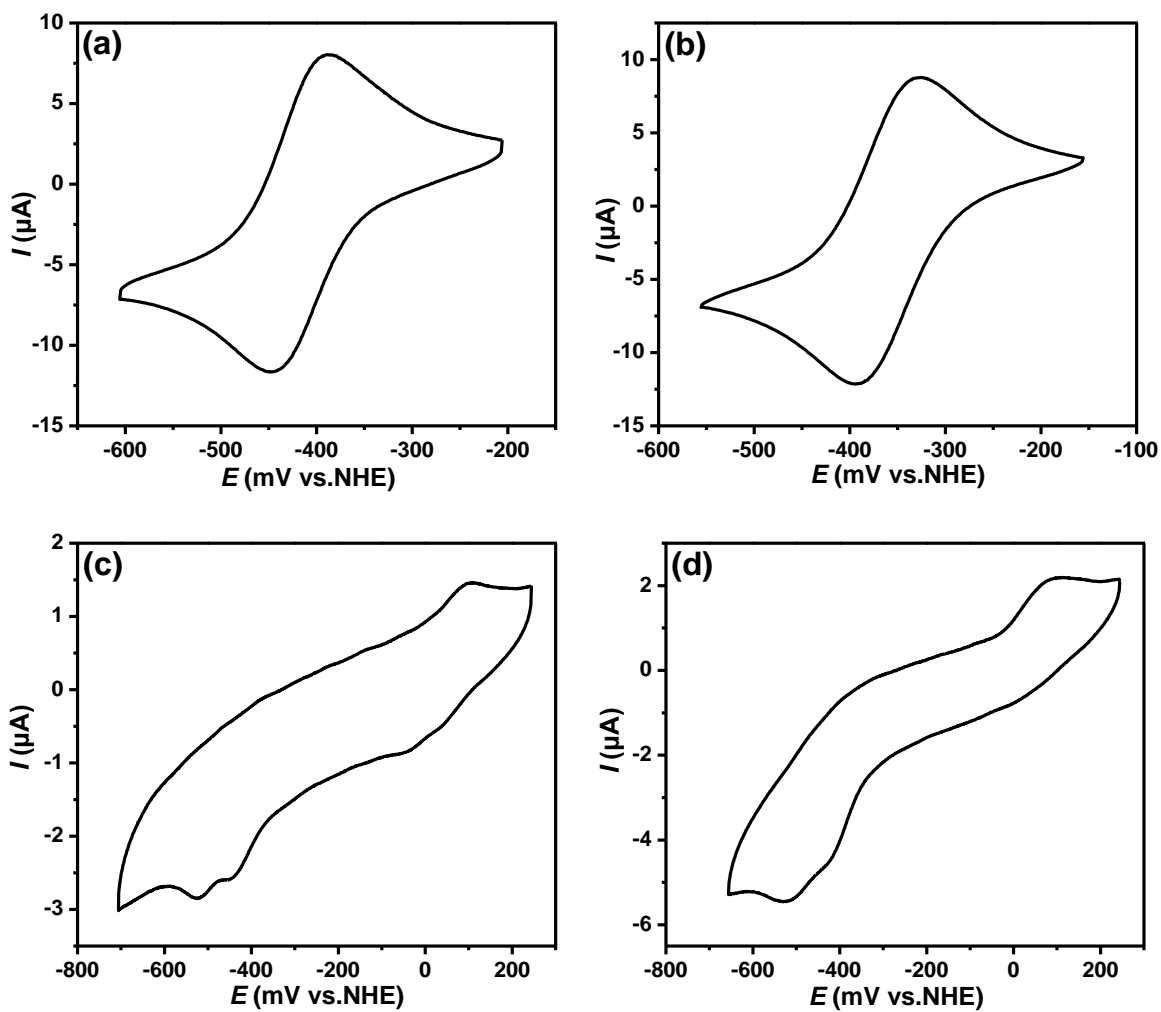

**Fig. S12** Cyclic voltammety curves of (a) paraquat, (b) diquat, (c) trifluralin and (d) oryzalin in water.



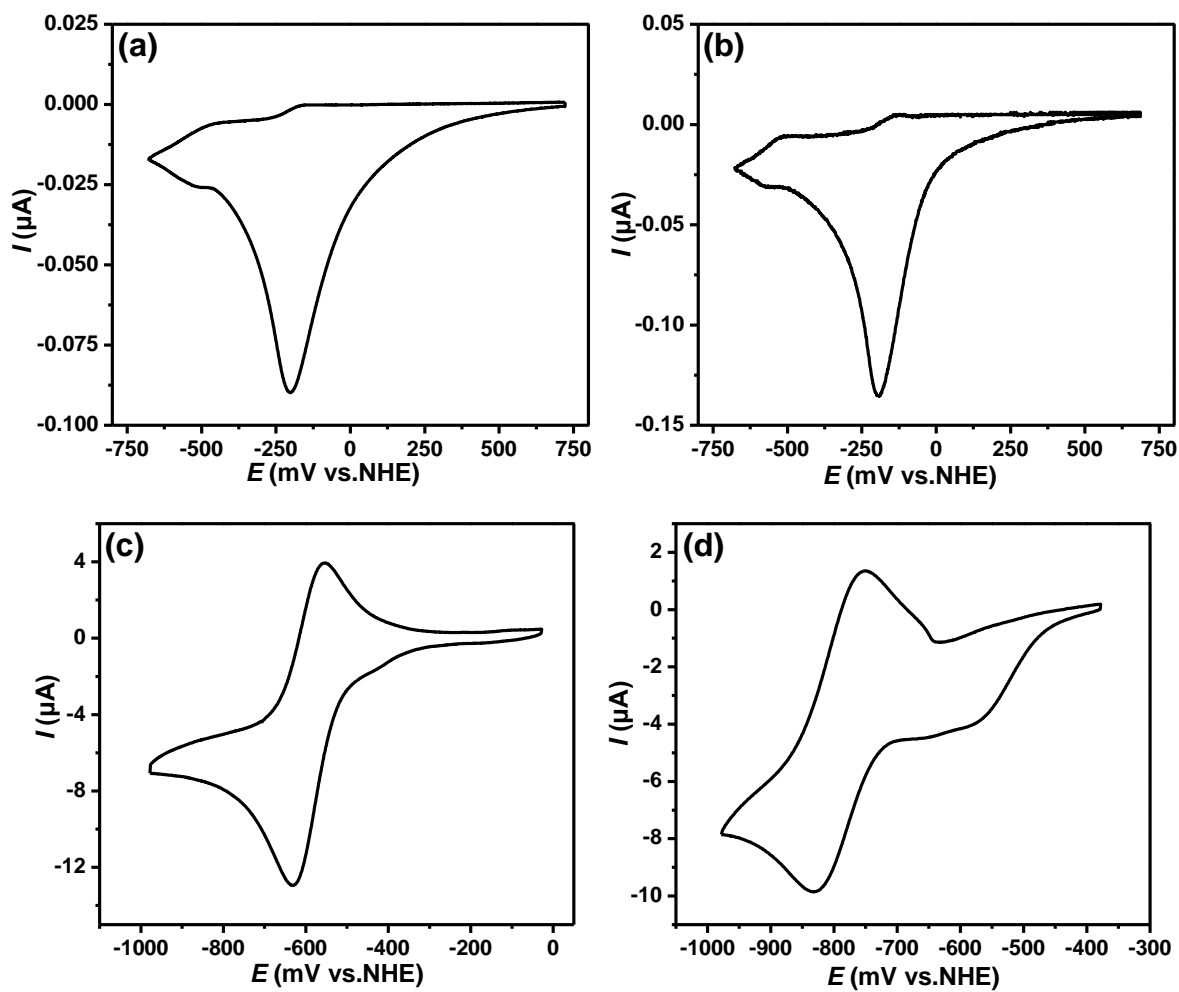

**Fig. S13** Cyclic voltammety curves of (a) paraquat, (b) diquat, (c) trifluralin and (d) oryzalin in DMF.

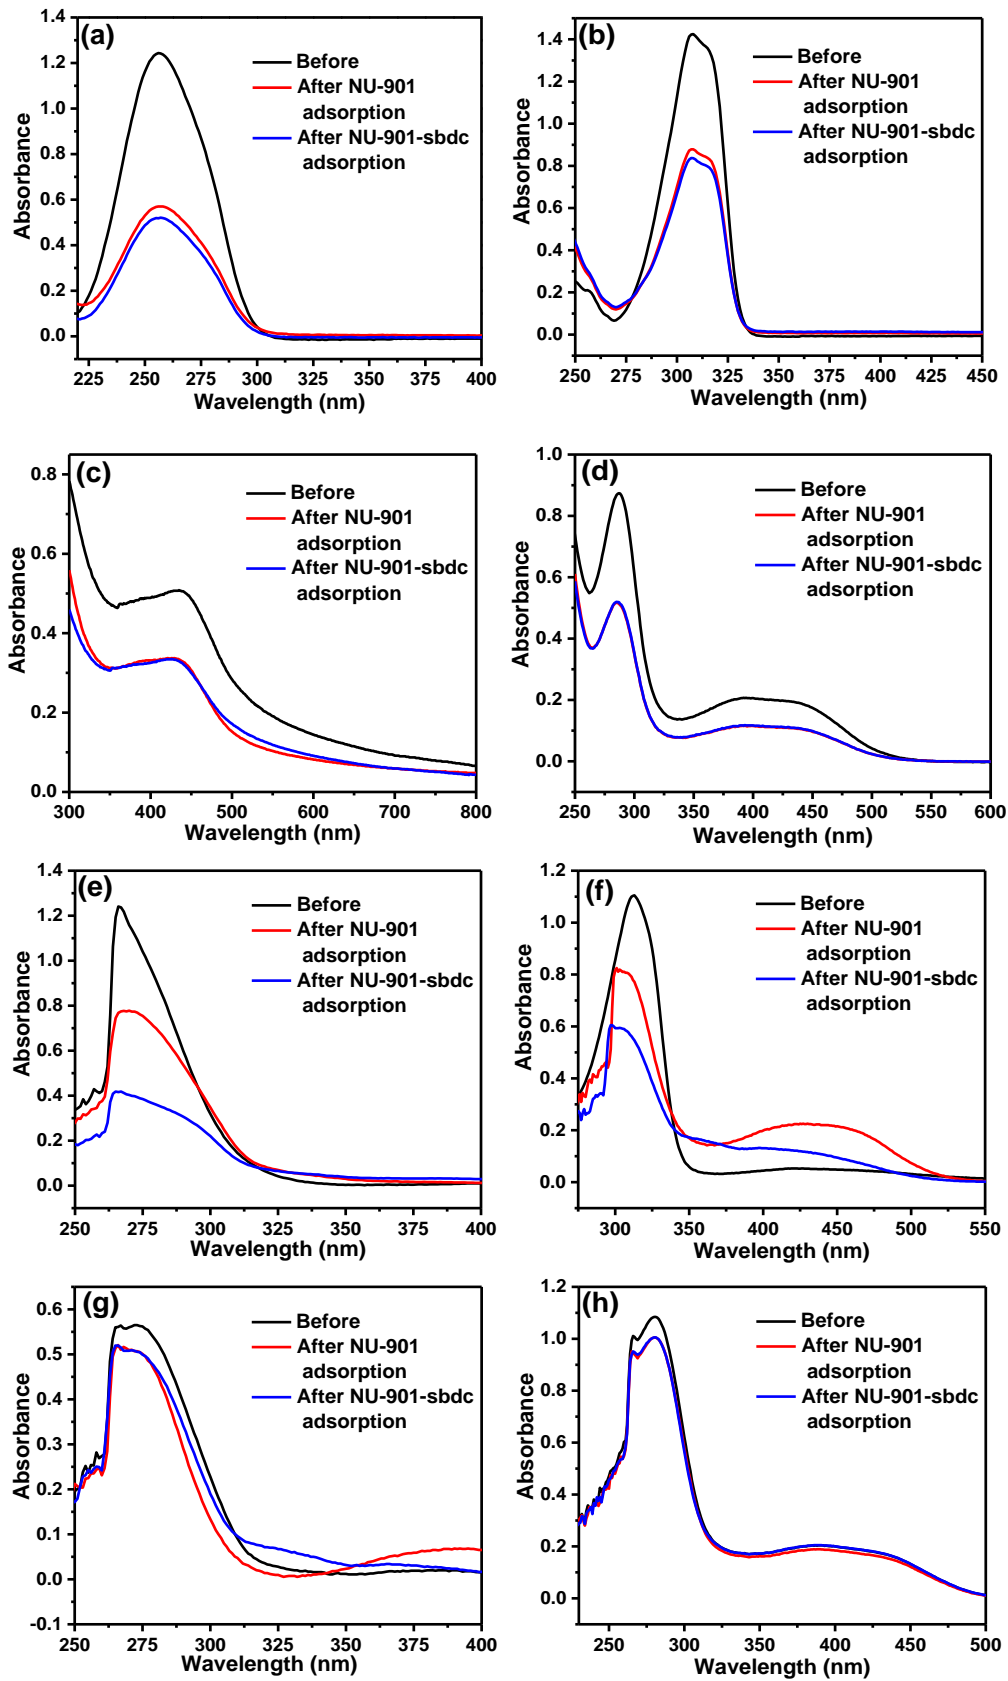

**Fig. S14** Absorption spectra of the solutions of paraquat (a, e), diquat (b, f), trifluralin (c, g), and oryzalin (d, h), in water (a–d) and DMF (e–h) before and after the adsorption by NU-901 and NU-901-sbdc.

**Table S1** Detection limits of recently reported paraquat responsive sensors.

| Sensing material                                              | Detection limit | Ref.      |
|---------------------------------------------------------------|-----------------|-----------|
| BN/MoS <sub>2</sub> /Au nanoparticles                         | 0.074 μM        | 1         |
| tripodal tri-pillar[5]arene-based molecule                    | 0.223 μM        | 2         |
| pyrenyl nanoassembly                                          | 40 nM           | 3         |
| N-GQDs/Hg <sup>2+</sup>                                       | 73.9 nM         | 4         |
| carboxymethyl-β-cyclodextrin supramolecule                    | 10 μM           | 5         |
| sod-type Tb-MOF                                               | 10 nM           | 6         |
| [Zn <sub>2</sub> (cptpy)(btc)(H <sub>2</sub> O)] <sub>n</sub> | 9.73 μM         | 7         |
| NU-901-sbdc (in DMF)                                          | 2.0 nM          | This work |
| NU-901 (in DMF)                                               | 6.3 nM          |           |
| NU-901-sbdc (in H <sub>2</sub> O)                             | 2.0 nM          |           |
| NU-901 (in H <sub>2</sub> O)                                  | 3.3 nM          |           |

## References

1. J. Zhang, Z. Lin, Y. Qin, Y. Li, X. Liu, Q. Li and H. Huang, *ACS omega*, 2019, **4**, 18398–18404.
2. Y.-F. Zhang, Z.-H. Wang, X.-Q. Yao, Y.-M. Zhang, T.-B. Wei, H. Yao and Q. Lin, *Sens. Actuators B: Chem.*, 2021, **327**, 128885.
3. H. Xu, K. Xiao, Q. Zhang, K. Huang, G. Song and Z. Yao, *ACS Sustain. Chem. Eng.*, 2020, **8**, 6861–6867.
4. F. Du, L. Sun, Q. Zen, W. Tan, Z. Cheng, G. Ruan and J. Li, *Sens. Actuators B: Chem.*, 2019, **288**, 96–103.
5. C. Liu, P. Wang, X. Liu, X. Yi, Z. Zhou and D. Liu, *New J. Chem.*, 2018, **42**, 17317–17322.
6. W. Du, Z. Zhu, Y. L. Bai, Z. Yang, S. Zhu, J. Xu, Z. Xie and J. Fang, *Chem. Commun.*, 2018, **54**, 5972–5975.
7. H. Chen, P. Fan, X. Tu, H. Min, X. Yu, X. Li, J. L. Zeng, S. Zhang and P. Cheng, *Chem. Asian J.*, 2019, **14**, 3611–3619.
